# Supplementary material
Source: PubMed Central journal article supplement (PMC11088794)
Supplement: NIHMS1987518-supplement-Suppl_2.pdf [file NIHMS1987518-supplement-Suppl_2.pdf]

**Title** Development and pre-pilot testing of STAMP+CBT: An mHealth app combining pain cognitive behavioral therapy and opioid support for patients with advanced cancer and pain

**Authors** Desiree R. Azizoddin,<sup>1,2</sup> Sara DeForge,<sup>1</sup> Ashton Baltazar,<sup>1</sup> Robert R. Edwards,<sup>3</sup> Matthew Allsop,<sup>4</sup> James A. Tulsy,<sup>2</sup> Michael S. Businelle,<sup>1</sup> Kristin L. Schreiber,<sup>3</sup> Andrea C. Enzinger<sup>5</sup>

1 Health Promotion Research Center, Stephenson Cancer Center, University of Oklahoma Health Sciences Center, Oklahoma City, OK, USA

2 Department of Psychosocial Oncology and Palliative Care, Dana-Farber Cancer Institute, Boston, MA, USA

3 Department of Anesthesiology, Perioperative, and Pain Medicine, Brigham and Women's Hospital, Boston, MA, USA

4 Academic Unit of Palliative Care, Leeds Institute of Health Sciences, University of Leeds, Leeds, UK, USA

5 Division of Population Sciences, Dana-Farber Cancer Institute, Boston, MA, USA

### **Corresponding Author**

Desiree R. Azizoddin

[Desiree-Azizoddin@ouhsc.edu](mailto:Desiree-Azizoddin@ouhsc.edu)

### **Supportive Care in Cancer**

**Online resource 2** Table listing participant recommended changes to the app and the actions taken based on the feedback

**Table 2. Participant recommended changes to the app (Lab and field UAT)**

| Category      | Recommendation                                                                                                               | Cohort      | Action                       |
|---------------|------------------------------------------------------------------------------------------------------------------------------|-------------|------------------------------|
| General       | Participant-initiated events on home screen to change notification times, medications, and SMART goal                        | Field       | Added goals                  |
|               | Button on home screen to give feedback and message staff                                                                     | Field       | Added                        |
|               | Panel for participants to set up their profile and configure settings                                                        | Field       | Infeasible                   |
|               | Place for participants to take notes                                                                                         | Field       | Considering                  |
|               | Log of completed surveys and content                                                                                         | Field       | Removed                      |
|               | Ability to report other non-cancer diagnoses or conditions                                                                   | Field       | Exploring                    |
|               | Create separate tabs for videos and games in app menus                                                                       | Field       | No change                    |
|               | Change title of relaxation exercises in the content library                                                                  | Field       | Changed                      |
| App content   | Clarify overly scientific or confusing wording                                                                               | Lab         | Changed                      |
|               | Include reaching out to others as a coping skill                                                                             | Lab         | Added                        |
|               | Add specific content for different types of cancer (i.e., tools for oral pain)                                               | Lab & Field | Infeasible                   |
|               | Shorten videos                                                                                                               | Field       | Changed                      |
|               | Share personalized content based on GPS location (i.e., sending certain messages when a participant is at a doctor's office) | Field       | Infeasible                   |
|               | Add more content about other participants' experiences                                                                       | Field       | Changed                      |
| Games         | Clarify game instructions                                                                                                    | Lab         | Changed                      |
|               | Use smiley faces and not stars when player answers correctly and make sure written praise is varied                          | Lab         | Emojis infeasible; No change |
|               | Release rather than pop negative thoughts                                                                                    | Lab         | Infeasible                   |
|               | Make the game less childish                                                                                                  | Field       | No Change                    |
|               | Create more games                                                                                                            |             | Adding                       |
| Notifications | Allow participants to snooze more than once and choose how long they would like to snooze the notification                   | Field       | Addressed with other changes |
| Surveys       | Add friendly language to the end of the survey (e.g., "See you again soon!")                                                 | Lab         | Added                        |
|               | Add anchors to survey responses                                                                                              | Lab         | Changed                      |
|               | Add more dosing response options for opioids                                                                                 | Lab         | Changed                      |
|               | Reduce repetition by removing links to educational content in end-of-survey messages (JITAI)                                 | Field       | Changed                      |
|               | Show participants trends in their scores over the past few days so they can evaluate what may have created changes           | Field       | In Progress                  |
| Tracking      | Increase the size of radio buttons or change the button type                                                                 | Field       | Infeasible                   |
|               | Option to track vital signs and health-related behaviors                                                                     | Field       | Infeasible                   |
|               | Tracking tool for non-opioid pain medications, other prescriptions, and over the counter medications                         | Field       | Considering                  |
|               | Ability to delete or revise opioid reporting history                                                                         | Field       | Infeasible                   |
|               | Feature that flags and analyzes bad pain days to alert participants to times their pain may worsen                           | Field       | Infeasible                   |

Add more than one goal and track them individually

Lab &  
Field

No Change

---
